# Supplementary material for: Molecular Characterization of Antibiotic Resistance Determinants in Klebsiella pneumoniae Isolates Recovered from Hospital Effluents in the Eastern Cape Province, South Africa
Source: MDPI journal article supplement (doi:10.3390/antibiotics12071139), 2023-07-01
Supplement: s1 [file s1]

**Table S1: Primer sequences of targeted resistance genes with their respective amplicon sizes and PCR cycling conditions.**

| Gene classification             | Target gene                                          | Primer Sequence (5'-3')                                                 | PCR condition                                                                           | cycling | Product size (bp) | Reference |
|---------------------------------|------------------------------------------------------|-------------------------------------------------------------------------|-----------------------------------------------------------------------------------------|---------|-------------------|-----------|
| <b>Beta-lactam</b>              |                                                      |                                                                         |                                                                                         |         |                   |           |
| <i>bla<sub>CTX-M1</sub></i>     | <i>MultiCTXMGp1_for</i><br><i>MultiCTXMGp1-2_rev</i> | TTAGGAARTGTGCCGCTGYA <sup>b</sup><br>CGATATCGTTGGTGGTRCCAT <sup>b</sup> | "94 °C (10mins), 94 °C (40sec), 60 °C (40sec), 72 °C (1min), 72 °C (7mins) x 30 cycles" |         | 688               | [59]      |
| <i>bla<sub>CTX-M2</sub></i>     | <i>MultiCTXMGp2_for</i><br><i>MultiCTXMGp1-2_rev</i> | CGTTAACGGCACGATGAC<br>CGATATCGTTGGTGGTRCCAT <sup>b</sup>                | "94 °C (10mins), 94 °C (40sec), 60 °C (40sec), 72 °C (1min), 72 °C (7mins) x 30 cycles" |         | 404               | [59]      |
| <i>bla<sub>CTX-M9</sub></i>     | <i>MultiCTXMGp9_for</i><br><i>MultiCTXMGp9_rev</i>   | TCAAGCCTGCCGATCTGGT<br>TGATTCTCGCCGCTGAAG                               | "94 °C (10mins), 94 °C (40sec), 60 °C (40sec), 72 °C (1min), 72 °C (7mins) x 30 cycles" |         | 561               | [59]      |
| <i>bla<sub>OXA-1-like</sub></i> | <i>MultiTSO-O_for</i><br><i>MultiTSO-O_rev</i>       | GGCACCAGATTCAACTTTCAAG<br>GACCCCAAGTTTCCTGTAAGTG                        | "94 °C (10mins), 94 °C (40sec), 60 °C (40sec), 72 °C (1min), 72 °C (7mins) x 30 cycles" |         | 564               | [59]      |
| <i>bla<sub>SHV</sub></i>        | <i>MultiTSO-S_for</i><br><i>MultiTSO-S_rev</i>       | AGCCGCTTGAGCAAATTAAC<br>ATCCCGCAGATAAATCACCAC                           | "94 °C (10mins), 94 °C (40sec), 60 °C (40sec), 72 °C (1min), 72 °C (7mins) x 30 cycles" |         | 713               | [59]      |
| <i>bla<sub>TEM</sub></i>        | <i>MultiTSO-T_for</i><br><i>MultiTSO-T_rev</i>       | CATTTCCGTGTCGCCCTTATTC<br>CGTTCATCCATAGTTCCTGAC                         | "94 °C (10mins), 94 °C (40sec), 60 °C (40sec), 72 °C (1min), 72 °C (7mins) x 30 cycles" |         | 800               | [59]      |

|                          |                                                                    |                                                                       |                                                                                                     |     |      |
|--------------------------|--------------------------------------------------------------------|-----------------------------------------------------------------------|-----------------------------------------------------------------------------------------------------|-----|------|
|                          |                                                                    |                                                                       | (40sec), 72 °C (1min),<br>72 °C (7mins) x 30<br>cycles"                                             |     |      |
| <i>bla<sub>VEB</sub></i> | <i>MultiVEB_for</i><br><i>MultiVEB_rev</i>                         | CATTTCCCGATGCAAAGCGT<br>CGAAGTTTCTTTGGACTCTG                          | "94 °C (10mins), 94<br>°C (40sec), 60 °C<br>(40sec), 72 °C (1min),<br>72 °C (7mins) x 30<br>cycles" | 648 | [59] |
| <i>bla<sub>PER</sub></i> | <i>MultiPER_for</i><br><i>MultiPER_rev</i>                         | GCTCCGATAATGAAAGCGT<br>TTCGGCTTGACTCGGCTGA                            | "94 °C (10mins), 94<br>°C (40sec), 60 °C<br>(40sec), 72 °C (1min),<br>72 °C (7mins) x 30<br>cycles" | 520 | [59] |
| <i>bla<sub>GES</sub></i> | <i>MultiGES_for</i><br><i>MultiGES_rev</i>                         | AGTCGGCTAGACCGGAAAG<br>TTTGTCCGTGCTCAGGAT                             | "94 °C (10mins), 94<br>°C (40sec), 57 °C<br>(40sec), 72 °C (1min),<br>72 °C (7mins) x 30<br>cycles" | 399 | [59] |
| <b>Carbapenem</b>        |                                                                    |                                                                       |                                                                                                     |     |      |
| <i>bla<sub>VIM</sub></i> | <i>MultiVIM_for<sup>c</sup></i><br><i>MultiVIM_rev<sup>c</sup></i> | GATGGTGT TTGGTCGCATA<br>CGAATGCGCAGCACCAG                             | "94 °C (10mins), 94<br>°C (40sec), 55 °C<br>(40sec), 72 °C (1min),<br>72 °C (7mins) x 30<br>cycles" | 390 | [59] |
| <i>bla<sub>IMP</sub></i> | <i>MultiIMP_for</i><br><i>MultiIMP_rev</i>                         | TTGACACTCCATTTACDG <sup>b</sup><br>GATYGAGAATTAAGCCACYCT <sup>b</sup> | "94 °C (10mins), 94<br>°C (40sec), 55 °C<br>(40sec), 72 °C (1min),                                  | 139 | [59] |

|                                  |                                                                          |                                                    |                                                                                         |     |      |
|----------------------------------|--------------------------------------------------------------------------|----------------------------------------------------|-----------------------------------------------------------------------------------------|-----|------|
|                                  |                                                                          |                                                    | 72 °C (7mins) x 30 cycles"                                                              |     |      |
| <i>bla<sub>OXA-48-like</sub></i> | <i>bla<sub>OXA-48-like-F</sub></i><br><i>bla<sub>OXA-48-like-R</sub></i> | TTGGTGGCATCGATTATCGG<br>GAGC ACTT CTTT TGTG ATGG C | "94 °C (10mins), 94 °C (40sec), 57 °C (40sec), 72 °C (1min), 72 °C (7mins) x 30 cycles" | 744 | [59] |
| <i>bla<sub>NDM-1</sub></i>       | <i>bla<sub>NDM-1-F</sub></i><br><i>bla<sub>NDM-1-R</sub></i>             | AAAACGGCAAGAAAAAGCAG<br>AAAACGGCAAGAAAAAGCAG       | "94 °C (10mins), 94 °C (40sec), 57 °C (40sec), 72 °C (1min), 72 °C (7mins) x 30 cycles" | 251 | [59] |
| <i>bla<sub>KPC</sub></i>         | <i>bla<sub>KPC-F</sub></i><br><i>bla<sub>KPC-R</sub></i>                 | AAAACGGCAAGAAAAAGCAG<br>AAAACGGCAAGAAAAAGCAG       | "94 °C (10mins), 94 °C (40sec), 55 °C (40sec), 72 °C (1min), 72 °C (7mins) x 30 cycles" | 301 | [59] |
| <b>Quinolones</b>                | <i>qnrA</i>                                                              | ATTCTCACGCCAGGATTTG<br>GATCGGCAAAGGTTAGGTCA        | "94 °C (10mins), 94 °C (45sec), 53 °C (45sec), 72 °C (1min), 72 °C (7mins) x 32 cycles" | 516 | [60] |
|                                  | <i>qnrB</i>                                                              | GATCGTGAAAGCCAGAAAGG<br>ACGATGCCTGGTAGTTGTCC       | "94 °C (10mins), 94 °C (45sec), 53 °C (45sec), 72 °C (1min), 72 °C (7mins) x 32 cycles" | 469 | [60] |
|                                  | <i>qnrS</i>                                                              | ACGACATTCGTCAACTGCAA<br>TAAATTGGCACCTGTAGGC        | "94 °C (10mins), 94 °C (45sec), 53 °C (45sec), 72 °C (1min),                            | 417 | [60] |

|                        |                                      |                                                   |                                                                                            |     |      |
|------------------------|--------------------------------------|---------------------------------------------------|--------------------------------------------------------------------------------------------|-----|------|
|                        |                                      |                                                   | 72 °C (7mins) x 32 cycles"                                                                 |     |      |
| <b>Aminoglycosides</b> | <i>aac(3)-IIa(aacC2)<sup>a</sup></i> | F:CGGAAGGCAATAACGGAG<br>R:TCGAACAGGTAGCACTGAG     | "94 °C (5mins), 94 °C (30sec), 50 °C (30sec), 72 °C (1.30mins), 72 °C (5mins) x 30 cycles" | 428 | [61] |
|                        | <i>aadA</i>                          | F:GTGGATGGCGGCCTGAAGCC<br>R:AATGCCCAGTCGGCAGCG    | "94 °C (4mins), 94 °C (45sec), 50 °C (45sec), 72 °C (45secs), 72 °C (7mins) x 30 cycles"   | 318 | [62] |
|                        | <i>strA</i>                          | F:CTTGGTGATAACGGCAATTC<br>R:CCAATCGCAGATAGAAGGC   | "94 °C (4mins), 94 °C (45sec), 50 °C (45sec), 72 °C (45secs), 72 °C (7mins) x 30 cycles"   | 348 | [62] |
|                        | <i>aph(3)-Ia(aphA1)<sup>a</sup></i>  | F:ATGGGCTCGCGATAATGTC<br>R:CTCACCGAGGCAGTTCCAT    | "94 °C (5mins), 94 °C (30sec), 50 °C (30sec), 72 °C (1.30mins), 72 °C (5mins) x 30 cycles" | 600 | [61] |
| <b>Sulphonamides</b>   | <i>sul1</i>                          | F:TTCGGCATTCTGAATCTCAC<br>R:ATGATCTAACCCCTCGGTCTC | "94 °C (5mins), 94 °C (1min), 55 °C (1min), 72 °C (5mins), 72 °C (5mins) x 35 cycles"      | 722 | [61] |
|                        | <i>sul11</i>                         | F:CGGCATCGTCAACATAACC<br>R:GTGTGCGGATGAAGTCAG     | "94 °C (5mins), 94 °C (30sec), 50 °C (30sec), 72 °C (1.5mins), 72 °C (5mins) x 30 cycles"  | 256 | [63] |

|                     |              |                                                         |                                                                                           |     |      |
|---------------------|--------------|---------------------------------------------------------|-------------------------------------------------------------------------------------------|-----|------|
| <b>Phenicol</b>     | <i>cat1</i>  | F:AGTTGCTCAATGTACCTATAACC<br>R:TTGTAATTCATTAAGCATTCTGCC | “94 °C (5mins), 94 °C (30sec), 50 °C (30sec), 72 °C (1.5mins), 72 °C (5mins) x 30 cycles” | 320 | [61] |
|                     | <i>cat11</i> | F:ACACTTTGCCCTTTATCGTC<br>R:TGAAAGCCATCACATACTGC        | “94 °C (5mins), 94 °C (30sec), 50 °C (30sec), 72 °C (1.5mins), 72 °C (5mins) x 30 cycles” | 543 | [61] |
|                     | <i>cmlA1</i> | F: CACCAATCATGACCAAG<br>R: GGCATCACTCGGCATGGACATG       | “94 °C (5mins), 94 °C (30sec), 50 °C (30sec), 72 °C (1.5mins), 72 °C (5mins) x 30 cycles” | 115 | [64] |
| <b>Tetracycline</b> | <i>tetA</i>  | F: GCTACATCCTGCTTGCCTTC<br>R:CATAGATCGCCGTGAAGAGG       | “94 °C (5mins), 94 °C (1min), 55 °C (1min), 72 °C (1.5mins), 72 °C (5mins) x 35 cycles”   | 201 | [65] |
|                     | <i>tetB</i>  | F: TTGGTTAGGGGCAAGTTTTG<br>R:GTAATGGGCCAATAACACCG       | “94 °C (5mins), 94 °C (1min), 55 °C (1min), 72 °C (1.5mins), 72 °C (5mins) x 35 cycles”   | 659 | [65] |
|                     | <i>tetC</i>  | F: CTTGAGAGCCTTCAACCCAG<br>R: ATGGTCGTCATCTACCTGCC      | “94 °C (5mins), 94 °C (1min), 55 °C (1min), 72 °C (1.5mins), 72 °C (5mins) x 35 cycles”   | 418 | [65] |
|                     | <i>tetD</i>  | F:AAACCATTACGGCATTCTGC<br>R:GACCGGATACACCATCCATC        | “94 °C (5mins), 94 °C (1min), 55 °C (1min), 72 °C (1.5mins), 72 °C (5mins) x 35 cycles”   | 787 | [65] |

|             |                                                    |                                                                                                  |     |      |
|-------------|----------------------------------------------------|--------------------------------------------------------------------------------------------------|-----|------|
| <i>tetK</i> | F:GTAGCGACAATAGGTAATAGT<br>R:GTAGTGACAATAAACCTCCTA | "94 °C (5mins), 94 °C<br>(1min), 55 °C (1min),<br>72 °C (1.5mins), 72 °C<br>(5mins) x 35 cycles" | 760 | [66] |
| <i>tetM</i> | F: AGTGGAGCGATTACAGAA<br>R:CATATGTCCTGGCGTGTCTA    | "94 °C (5mins), 94 °C<br>(1min), 55 °C (1min),<br>72 °C (1.5mins), 72 °C<br>(5mins) x 35 cycles" | 158 | [66] |

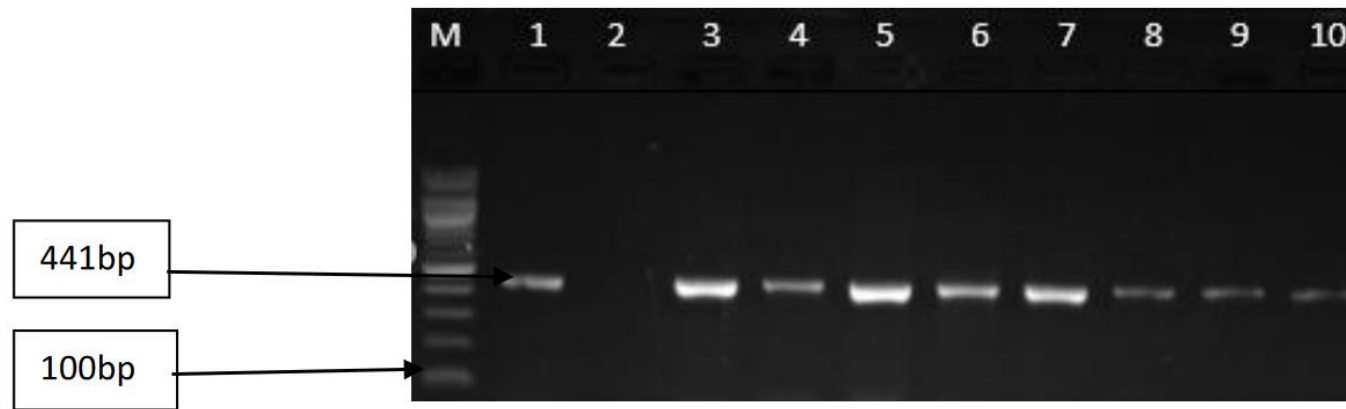

**Figure S1.** Agarose gel electrophoresis showing confirmed *Klebsiella* spp (*gyrA*). Lane M:100 bp DNA ladder, lane 1: Positive control (*K. pneumoniae* ATCC 35657), lane 2: Negative control lane 3-10 positive *Klebsiella* spp. isolates.

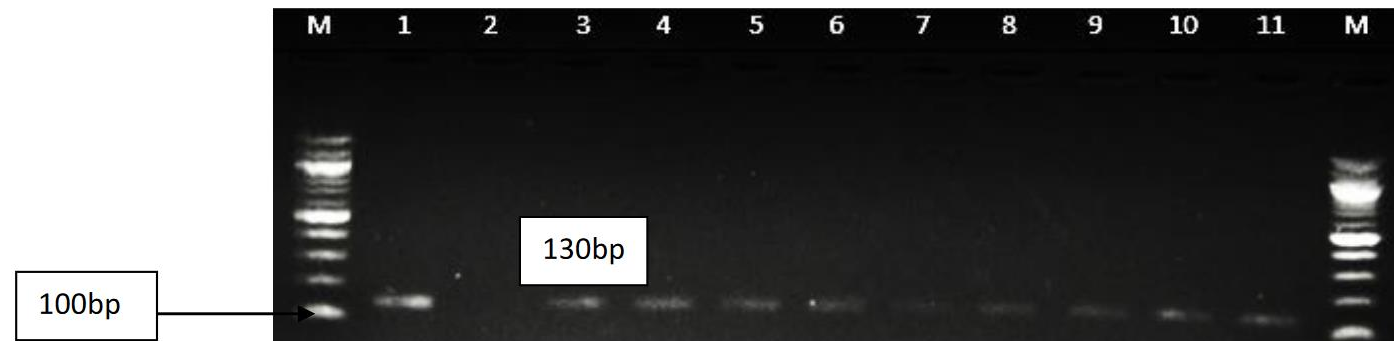

**Figure S2.** Agarose gel electrophoresis showing confirmed *Klebsiella pneumoniae* (*magA*). Lane M:100 bp DNA ladder, lane 1: Positive control (*K. pneumoniae* ATCC 35657), lane 2: Negative control, lane 3-11 positive *K. pneumoniae* isolates.

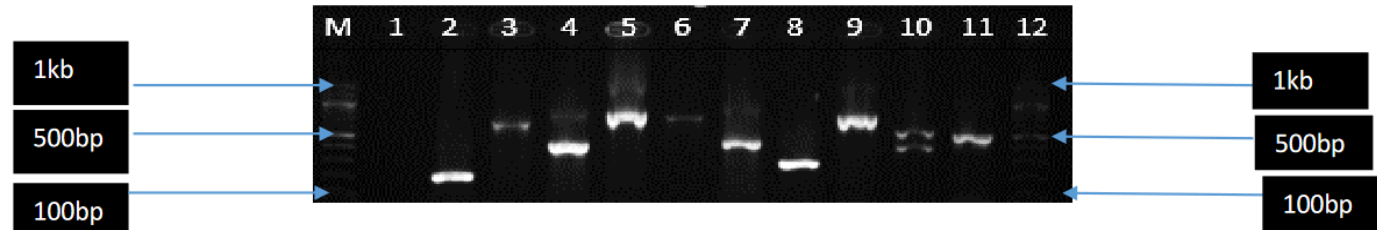

**Figure S3.** A representative gel electrophoresis profile of some antimicrobial resistance genes of *K. pneumoniae* isolates. Lanes M and 12: molecular weight marker (Thermo Scientific 100 bp DNA ladder), lane 1: negative control, lane 2: *tetA* (201bp), lane 3: *tetB*, (659bp), lane 4: *tetC* (418 bp), lane 5: *tetD* (787 bp), lane 6: *tetK* (750 bp), lane 7: *sul1* (722 bp), lane 8: *sul11* (256 bp), lane 9: *aac(3)-IIa(aacC2)<sup>a</sup>* (428 bp), lane 10: *strA*(348 bp), and lane 11: *aadA* (318 bp).

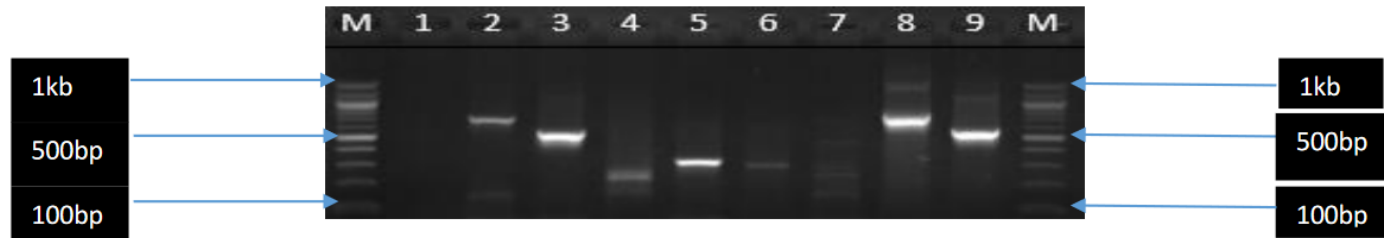

**Figure S4.** A representative gel electrophoresis profile of some antimicrobial resistance genes of *K. pneumoniae* isolates. Lanes M: molecular weight marker (Thermo Scientific 100 bp DNA ladder), lane 1: negative control, lane 2: *bla<sub>SHV</sub>* (713bp), lane 3: *bla<sub>oxa-1-like</sub>* (564bp), lane 4: *bla<sub>IMP</sub>* (139 bp), lane 5: *bla<sub>KPC</sub>* (301 bp), lane 6: *bla<sub>NDM-1</sub>*(251 bp), lane 7: *bla<sub>OXA-48</sub>* (281 bp), lane 8: *bla<sub>TEM</sub>*(800 bp), lane 9: *bla<sub>CTXM-9</sub>* (561 bp).



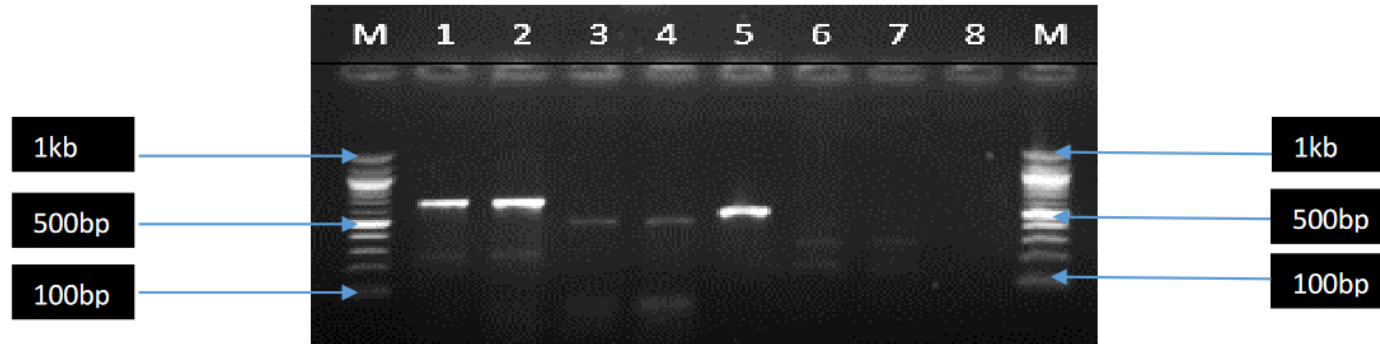

**Figure S5.** A representative gel electrophoresis profile of some antimicrobial resistance genes of *K. pneumoniae* isolates. Lane M: molecular weight marker (Thermo Scientific 100 bp DNA ladder), lanes 1 and 2: bla<sub>CTX-M-1</sub> (688bp), lanes 3 and 4: QnrB (469bp), lane 5: Cat11 (543bp), lane 6: bla<sub>VIM</sub> (390 bp), lane 7: Cat1 (320 bp), lane 8: negative control.
